# Supplementary material for: Quality of diet and mortality among Japanese men and women: Japan Public Health Center based prospective study
Source: PubMed Central journal article supplement — BMJ. 2016 Mar 22;352:i1209. doi: 10.1136/bmj.i1209 (PMC4804125; doi:10.1136/bmj.i1209), 2016-03-22
Supplement: kurk028384.ww1_default.pdf [file kurk028384.ww1_default.pdf]

**Appendix 1: Supplementary tables [posted as supplied by author]****Table A** Multivariable-adjusted hazard ratios (95% confidence intervals) of mortality according to dish category scores on adherence to the Japanese Food Guide Spinning Top.

|                                                 | <b>1-point increment</b> | <b>P trend*</b> |
|-------------------------------------------------|--------------------------|-----------------|
| <b><i>Total mortality</i></b>                   |                          |                 |
| Grain dishes                                    | 0.99 (0.98 to 1.004)     | 0.22            |
| Vegetable dishes                                | 0.98 (0.97 to 0.99)      | < 0.0001        |
| Fish and meat dishes                            | 0.99 (0.99 to 0.999)     | 0.02            |
| Milk                                            | 0.99 (0.99 to 0.99995)   | 0.048           |
| Fruits                                          | 0.98 (0.98 to 0.99)      | < 0.0001        |
| Total energy                                    | 0.98 (0.97 to 0.99)      | 0.006           |
| Snacks and alcoholic beverages                  | 1.00 (0.99 to 1.004)     | 0.61            |
| <b><i>Cancer mortality</i></b>                  |                          |                 |
| Grain dishes                                    | 0.98 (0.97 to 1.001)     | 0.06            |
| Vegetable dishes                                | 0.99 (0.98 to 1.01)      | 0.30            |
| Fish and meat dishes                            | 1.00 (0.99 to 1.01)      | 0.38            |
| Milk                                            | 1.00 (0.99 to 1.01)      | 0.57            |
| Fruits                                          | 1.00 (0.99 to 1.01)      | 0.89            |
| Total energy                                    | 1.00 (0.98 to 1.02)      | 0.73            |
| Snacks and alcoholic beverages                  | 1.00 (0.99 to 1.003)     | 0.24            |
| <b><i>Cardiovascular disease mortality</i></b>  |                          |                 |
| Grain dishes                                    | 1.01 (0.99 to 1.03)      | 0.30            |
| Vegetable dishes                                | 0.98 (0.97 to 0.997)     | 0.02            |
| Fish and meat dishes                            | 0.99 (0.98 to 1.005)     | 0.22            |
| Milk                                            | 0.99 (0.98 to 1.000)     | 0.06            |
| Fruits                                          | 0.98 (0.97 to 0.997)     | 0.01            |
| Total energy                                    | 1.01 (0.98 to 1.03)      | 0.63            |
| Snacks and alcoholic beverages                  | 1.00 (0.99 to 1.01)      | 0.49            |
| <b><i>Heart disease mortality</i></b>           |                          |                 |
| Grain dishes                                    | 1.01 (0.97 to 1.04)      | 0.73            |
| Vegetable dishes                                | 0.99 (0.97 to 1.01)      | 0.16            |
| Fish and meat dishes                            | 1.00 (0.99 to 1.02)      | 0.60            |
| Milk                                            | 0.98 (0.97 to 0.997)     | 0.02            |
| Fruits                                          | 0.99 (0.97 to 1.01)      | 0.23            |
| Total energy                                    | 1.02 (0.99 to 1.06)      | 0.26            |
| Snacks and alcoholic beverages                  | 1.00 (0.99 to 1.02)      | 0.80            |
| <b><i>Cerebrovascular disease mortality</i></b> |                          |                 |
| Grain dishes                                    | 1.03 (0.99 to 1.06)      | 0.16            |
| Vegetable dishes                                | 0.99 (0.96 to 1.01)      | 0.22            |
| Fish and meat dishes                            | 0.97 (0.95 to 0.99)      | 0.001           |
| Milk                                            | 0.99 (0.98 to 1.01)      | 0.46            |
| Fruits                                          | 0.98 (0.96 to 0.998)     | 0.03            |
| Total energy                                    | 0.99 (0.95 to 1.03)      | 0.61            |
| Snacks and alcoholic beverages                  | 0.99 (0.97 to 1.003)     | 0.09            |

\* Adjusted for age, sex, public health center area, body mass index, smoking status, total physical activity, a history of hypertension, a history of diabetes, a history of dyslipidemia, coffee consumption, green tea consumption and occupation.

**Table B** Multivariable-adjusted hazard ratios (95% confidence intervals) of mortality according to group scores on adherence to the Japanese Food Guide Spinning Top stratified by sex, body mass index, smoking status in men and menopausal status in women

|                                                    | Fourths of score |                        |                        |                        | 10-point increase      | P trend  |
|----------------------------------------------------|------------------|------------------------|------------------------|------------------------|------------------------|----------|
|                                                    | Q1               | Q2                     | Q3                     | Q4                     |                        |          |
| <b>Total mortality</b>                             |                  |                        |                        |                        |                        |          |
| <i>Men</i> *                                       | 1.00 (ref)       | 0.91<br>(0.86 to 0.96) | 0.87<br>(0.81 to 0.93) | 0.95<br>(0.85 to 1.07) | 0.93<br>(0.91 to 0.96) | < 0.0001 |
| <i>Women</i>                                       | 1.00 (ref)       | 0.94<br>(0.82 to 1.06) | 0.88<br>(0.78 to 0.99) | 0.82<br>(0.73 to 0.93) | 0.92<br>(0.89 to 0.96) | 0.0002   |
| P for interaction                                  |                  |                        |                        |                        |                        | 0.39     |
| <i>Body mass index &lt;25kg/m<sup>2</sup></i> †    | 1.00 (ref)       | 0.91<br>(0.85 to 0.96) | 0.82<br>(0.77 to 0.88) | 0.82<br>(0.75 to 0.89) | 0.91<br>(0.89 to 0.94) | < 0.0001 |
| <i>Body mass index ≥25kg/m<sup>2</sup></i>         | 1.00 (ref)       | 0.97<br>(0.87 to 1.08) | 1.04<br>(0.93 to 1.17) | 0.96<br>(0.84 to 1.10) | 0.98<br>(0.94 to 1.03) | 0.53     |
| P for interaction                                  |                  |                        |                        |                        |                        | < 0.0001 |
| <i>Non-smoker (men)</i> ‡                          | 1.00 (ref)       | 0.93<br>(0.85 to 1.02) | 0.93<br>(0.84 to 1.02) | 0.95<br>(0.81 to 1.10) | 0.95<br>(0.91 to 1.00) | 0.03     |
| <i>Current smoker (men)</i>                        | 1.00 (ref)       | 0.87<br>(0.80 to 0.95) | 0.79<br>(0.72 to 0.88) | 0.93<br>(0.78 to 1.10) | 0.90<br>(0.87 to 0.94) | < 0.0001 |
| <i>Current smoker adjusted for No. cigarette</i> § | 1.00 (ref)       | 0.88<br>(0.81 to 0.96) | 0.79<br>(0.71 to 0.88) | 0.94<br>(0.79 to 1.12) | 0.90<br>(0.87 to 0.94) | < 0.0001 |
| P for interaction                                  |                  |                        |                        |                        |                        | 0.03     |
| <i>Pre-menopausal (women)</i> ¶                    | 1.00 (ref)       | 0.83<br>(0.63 to 1.09) | 0.74<br>(0.57 to 0.96) | 0.78<br>(0.60 to 1.01) | 0.90<br>(0.82 to 0.99) | 0.04     |
| <i>Post-menopausal (women)</i>                     | 1.00 (ref)       | 0.97<br>(0.84 to 1.12) | 0.93<br>(0.81 to 1.06) | 0.85<br>(0.75 to 0.98) | 0.93<br>(0.89 to 0.98) | 0.003    |
| P for interaction                                  |                  |                        |                        |                        |                        | 0.76     |

(continued)

Table B continued

**Cancer mortality**

|                                                        |            |                        |                        |                        |                         |       |
|--------------------------------------------------------|------------|------------------------|------------------------|------------------------|-------------------------|-------|
| <i>Men</i> *                                           | 1.00 (ref) | 0.94<br>(0.86 to 1.03) | 0.88<br>(0.79 to 0.98) | 1.00<br>(0.84 to 1.18) | 0.95<br>(0.90 to 0.99)  | 0.02  |
| <i>Women</i>                                           | 1.00 (ref) | 1.00<br>(0.80 to 1.25) | 1.06<br>(0.86 to 1.29) | 1.04<br>(0.84 to 1.27) | 1.00<br>(0.94 to 1.07)  | 0.96  |
| P for interaction                                      |            |                        |                        |                        |                         | 0.11  |
| <i>Body mass index</i> <25kg/m <sup>2</sup> †          | 1.00 (ref) | 0.94<br>(0.85 to 1.04) | 0.92<br>(0.83 to 1.02) | 0.95<br>(0.83 to 1.07) | 0.95<br>(0.91 to 0.99)  | 0.02  |
| <i>Body mass index</i> ≥25kg/m <sup>2</sup>            | 1.00 (ref) | 0.90<br>(0.76 to 1.07) | 0.98<br>(0.82 to 1.16) | 1.02<br>(0.83 to 1.26) | 1.01<br>(0.94 to 1.09)  | 0.79  |
| P for interaction                                      |            |                        |                        |                        |                         | 0.003 |
| <i>Non-smoker (men)</i> ‡                              | 1.00 (ref) | 0.90<br>(0.78 to 1.04) | 0.91<br>(0.78 to 1.06) | 0.79<br>(0.61 to 1.03) | 0.93<br>(0.86 to 0.99)  | 0.03  |
| <i>Current smoker (men)</i>                            | 1.00 (ref) | 0.94<br>(0.83 to 1.06) | 0.83<br>(0.71 to 0.96) | 1.16<br>(0.92 to 1.46) | 0.94<br>(0.89 to 1.002) | 0.06  |
| <i>Current smoker adjusted for<br/>No. cigarette</i> § | 1.00 (ref) | 0.94<br>(0.83 to 1.07) | 0.82<br>(0.70 to 0.95) | 1.16<br>(0.91 to 1.48) | 0.94<br>(0.88 to 0.998) | 0.04  |
| P for interaction                                      |            |                        |                        |                        |                         | 0.83  |
| <i>Pre-menopausal (women)</i> ¶                        | 1.00 (ref) | 0.80<br>(0.52 to 1.23) | 0.83<br>(0.56 to 1.24) | 0.95<br>(0.64 to 1.42) | 1.01<br>(0.87 to 1.17)  | 0.89  |
| <i>Post-menopausal (women)</i>                         | 1.00 (ref) | 1.09<br>(0.84 to 1.41) | 1.16<br>(0.91 to 1.47) | 1.10<br>(0.87 to 1.40) | 1.01<br>(0.94 to 1.09)  | 0.83  |
| P for interaction                                      |            |                        |                        |                        |                         | 0.81  |

**Cardiovascular disease mortality**

|                   |            |                        |                        |                        |                        |      |
|-------------------|------------|------------------------|------------------------|------------------------|------------------------|------|
| <i>Men</i> *      | 1.00 (ref) | 0.97<br>(0.86 to 1.10) | 0.85<br>(0.73 to 0.97) | 1.11<br>(0.89 to 1.37) | 0.96<br>(0.91 to 1.02) | 0.18 |
| <i>Women</i>      | 1.00 (ref) | 0.90<br>(0.71 to 1.14) | 0.84<br>(0.67 to 1.05) | 0.75<br>(0.60 to 0.94) | 0.90<br>(0.84 to 0.98) | 0.01 |
| P for interaction |            |                        |                        |                        |                        | 0.08 |

(continued)

Table B continued

|                                                    |            |                        |                        |                        |                         |       |
|----------------------------------------------------|------------|------------------------|------------------------|------------------------|-------------------------|-------|
| <i>Body mass index</i> <25kg/m <sup>2</sup> †      | 1.00 (ref) | 0.94<br>(0.83 to 1.07) | 0.77<br>(0.67 to 0.88) | 0.78<br>(0.67 to 0.92) | 0.91<br>(0.86 to 0.96)  | 0.001 |
| <i>Body mass index</i> ≥25kg/m <sup>2</sup>        | 1.00 (ref) | 1.03<br>(0.83 to 1.27) | 1.09<br>(0.88 to 1.36) | 0.98<br>(0.74 to 1.28) | 0.99<br>(0.90 to 1.09)  | 0.87  |
| P for interaction                                  |            |                        |                        |                        |                         | 0.69  |
| <i>Non-smoker (men)</i> ‡                          | 1.00 (ref) | 1.05<br>(0.87 to 1.25) | 0.92<br>(0.75 to 1.13) | 1.13<br>(0.84 to 1.53) | 1.00<br>(0.91 to 1.09)  | 0.92  |
| <i>Current smoker (men)</i>                        | 1.00 (ref) | 0.90<br>(0.77 to 1.07) | 0.76<br>(0.62 to 0.94) | 1.09<br>(0.79 to 1.51) | 0.92<br>(0.85 to 1.002) | 0.055 |
| <i>Current smoker adjusted for No. cigarette</i> § | 1.00 (ref) | 0.90<br>(0.76 to 1.06) | 0.74<br>(0.60 to 0.92) | 1.11<br>(0.80 to 1.54) | 0.92<br>(0.84 to 0.998) | 0.04  |
| P for interaction                                  |            |                        |                        |                        |                         | 0.20  |
| <i>Pre-menopausal (women)</i> ¶                    | 1.00 (ref) | 0.79<br>(0.47 to 1.34) | 0.65<br>(0.39 to 1.09) | 0.60<br>(0.35 to 1.01) | 0.81<br>(0.66 to 0.98)  | 0.03  |
| <i>Post-menopausal (women)</i>                     | 1.00 (ref) | 0.95<br>(0.73 to 1.24) | 0.90<br>(0.70 to 1.16) | 0.81<br>(0.63 to 1.04) | 0.93<br>(0.85 to 1.01)  | 0.09  |
| P for interaction                                  |            |                        |                        |                        |                         | 0.28  |
| <b>Heart disease mortality</b>                     |            |                        |                        |                        |                         |       |
| <i>Men</i> *                                       | 1.00 (ref) | 1.02<br>(0.87 to 1.20) | 0.93<br>(0.77 to 1.13) | 0.94<br>(0.69 to 1.30) | 0.98<br>(0.91 to 1.07)  | 0.70  |
| <i>Women</i>                                       | 1.00 (ref) | 0.78<br>(0.56 to 1.08) | 0.84<br>(0.62 to 1.13) | 0.75<br>(0.55 to 1.01) | 0.93<br>(0.84 to 1.04)  | 0.23  |
| P for interaction                                  |            |                        |                        |                        |                         | 0.12  |
| <i>Body mass index</i> <25kg/m <sup>2</sup> †      | 1.00 (ref) | 1.00<br>(0.85 to 1.19) | 0.80<br>(0.66 to 0.96) | 0.84<br>(0.67 to 1.05) | 0.94<br>(0.87 to 1.02)  | 0.15  |
| <i>Body mass index</i> ≥25kg/m <sup>2</sup>        | 1.00 (ref) | 0.87<br>(0.65 to 1.17) | 1.18<br>(0.88 to 1.57) | 0.74<br>(0.50 to 1.09) | 0.95<br>(0.84 to 1.08)  | 0.47  |
| P for interaction                                  |            |                        |                        |                        |                         | 0.72  |

(continued)

Table B continued

|                                                        |            |                        |                        |                        |                        |        |
|--------------------------------------------------------|------------|------------------------|------------------------|------------------------|------------------------|--------|
| <i>Non-smoker (men)</i> ‡                              | 1.00 (ref) | 1.07<br>(0.84 to 1.36) | 1.05<br>(0.81 to 1.37) | 0.89<br>(0.57 to 1.39) | 1.00<br>(0.89 to 1.13) | 0.99   |
| <i>Current smoker (men)</i>                            | 1.00 (ref) | 0.98<br>(0.78 to 1.23) | 0.76<br>(0.57 to 1.02) | 0.97<br>(0.60 to 1.56) | 0.95<br>(0.85 to 1.06) | 0.38   |
| <i>Current smoker adjusted for<br/>No. cigarette</i> § | 1.00 (ref) | 1.02<br>(0.80 to 1.28) | 0.80<br>(0.59 to 1.08) | 1.08<br>(0.66 to 1.75) | 0.94<br>(0.84 to 1.06) | 0.30   |
| P for interaction                                      |            |                        |                        |                        |                        | 0.31   |
| <i>Pre-menopausal (women)</i> ¶                        | 1.00 (ref) | 0.68<br>(0.30 to 1.54) | 0.64<br>(0.29 to 1.39) | 0.79<br>(0.37 to 1.65) | 0.94<br>(0.70 to 1.26) | 0.66   |
| <i>Post-menopausal (women)</i>                         | 1.00 (ref) | 0.81<br>(0.57 to 1.16) | 0.88<br>(0.63 to 1.23) | 0.75<br>(0.54 to 1.06) | 0.93<br>(0.83 to 1.05) | 0.25   |
| P for interaction                                      |            |                        |                        |                        |                        | 0.77   |
| <b>Cerebrovascular disease mortality</b>               |            |                        |                        |                        |                        |        |
| <i>Men</i> *                                           | 1.00 (ref) | 0.94<br>(0.78 to 1.15) | 0.82<br>(0.65 to 1.03) | 1.28<br>(0.92 to 1.78) | 0.94<br>(0.86 to 1.04) | 0.22   |
| <i>Women</i>                                           | 1.00 (ref) | 0.96<br>(0.67 to 1.38) | 0.73<br>(0.52 to 1.04) | 0.62<br>(0.44 to 0.88) | 0.81<br>(0.72 to 0.92) | 0.001  |
| P for interaction                                      |            |                        |                        |                        |                        | 0.07   |
| <i>Body mass index &lt;25kg/m<sup>2</sup></i> †        | 1.00 (ref) | 0.91<br>(0.75 to 1.11) | 0.76<br>(0.62 to 0.95) | 0.68<br>(0.53 to 0.88) | 0.84<br>(0.77 to 0.92) | 0.0001 |
| <i>Body mass index ≥25kg/m<sup>2</sup></i>             | 1.00 (ref) | 1.19<br>(0.84 to 1.69) | 0.95<br>(0.64 to 1.39) | 1.24<br>(0.81 to 1.91) | 1.05<br>(0.90 to 1.23) | 0.53   |
| P for interaction                                      |            |                        |                        |                        |                        | 0.09   |

(continued)

Table B continued

|                                                        |            |                        |                        |                        |                        |      |
|--------------------------------------------------------|------------|------------------------|------------------------|------------------------|------------------------|------|
| <i>Non-smoker (men)</i> ‡                              | 1.00 (ref) | 0.98<br>(0.73 to 1.31) | 0.80<br>(0.57 to 1.11) | 1.41<br>(0.91 to 2.18) | 0.99<br>(0.86 to 1.15) | 0.93 |
| <i>Current smoker (men)</i>                            | 1.00 (ref) | 0.89<br>(0.68 to 1.16) | 0.87<br>(0.63 to 1.20) | 1.19<br>(0.72 to 1.98) | 0.91<br>(0.79 to 1.03) | 0.14 |
| <i>Current smoker adjusted for<br/>No. cigarette</i> § | 1.00 (ref) | 0.97<br>(0.74 to 1.28) | 0.92<br>(0.66 to 1.29) | 1.42<br>(0.85 to 2.36) | 0.90<br>(0.79 to 1.03) | 0.14 |
| P for interaction                                      |            |                        |                        |                        |                        | 0.39 |
| <i>Pre-menopausal (women)</i> ¶                        | 1.00 (ref) | 0.85<br>(0.41 to 1.76) | 0.60<br>(0.29 to 1.24) | 0.40<br>(0.18 to 0.87) | 0.67<br>(0.50 to 0.89) | 0.01 |
| <i>Post-menopausal (women)</i>                         | 1.00 (ref) | 1.03<br>(0.67 to 1.56) | 0.81<br>(0.54 to 1.21) | 0.71<br>(0.48 to 1.07) | 0.86<br>(0.75 to 0.98) | 0.03 |
| P for interaction                                      |            |                        |                        |                        |                        | 0.12 |

\* Adjusted for age, public health center area, body mass index, smoking status, total physical activity, a history of hypertension, a history of diabetes, a history of dyslipidemia, coffee consumption, green tea consumption and occupation.

† Adjusted for age, sex, public health center area, body mass index (continuous), smoking status, total physical activity, a history of hypertension, a history of diabetes, a history of dyslipidemia, coffee consumption, green tea consumption and occupation.

‡ Among men, adjusted for age, public health center area, body mass index, total physical activity, a history of hypertension, a history of diabetes, a history of dyslipidemia, coffee consumption, green tea consumption and occupation.

§ Among men, adjusted for age, public health center area, body mass index, total physical activity, a history of hypertension, a history of diabetes, a history of dyslipidemia, coffee consumption, green tea consumption, occupation and number of cigarettes.

¶ Among women, adjusted for age, public health center area, body mass index, total physical activity, a history of hypertension, a history of diabetes, a history of dyslipidemia, coffee consumption, green tea consumption and occupation.
