# Supplementary material for: Quality of diet and mortality among Japanese men and women: Japan Public Health Center based prospective study
Source: PubMed Central journal article supplement — BMJ. 2016 Mar 22;352:i1209. doi: 10.1136/bmj.i1209 (PMC4804125; doi:10.1136/bmj.i1209), 2016-03-22

## Appendix 2: Supplementary figures [posted as supplied by author]

Restricted cubic spline regression model between the Japanese Food Guide Spinning Top score and risk of mortality and cause-specific mortality: (A) Total mortality, (B) Cancer mortality; (C) Cardiovascular disease mortality; (D) Heart disease mortality; and (E) Cerebrovascular disease mortality.

Spline regression (five knots, reference value: 8). Continuous line, Hazard ratios; Dashed lines, 95% confidence intervals. The model was adjusted for age, sex, public health center area, body mass index, smoking status, total physical activity, a history of hypertension, a history of diabetes, a history of dyslipidemia, coffee consumption, green tea consumption and occupation. In this analysis, an indicator variable for missing data was created for each covariate.

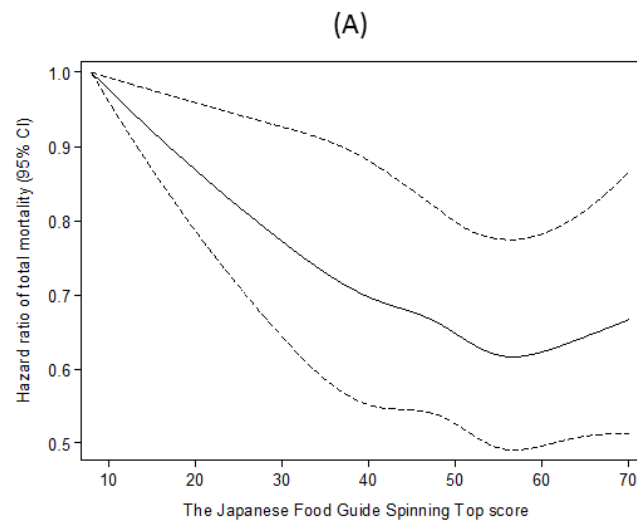

(B)

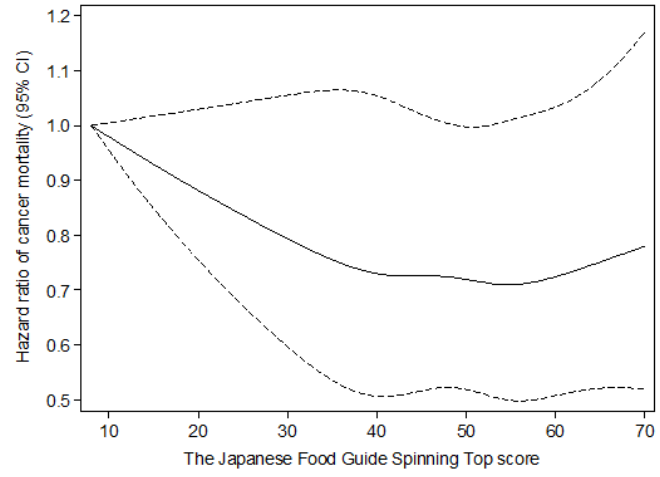

(C)

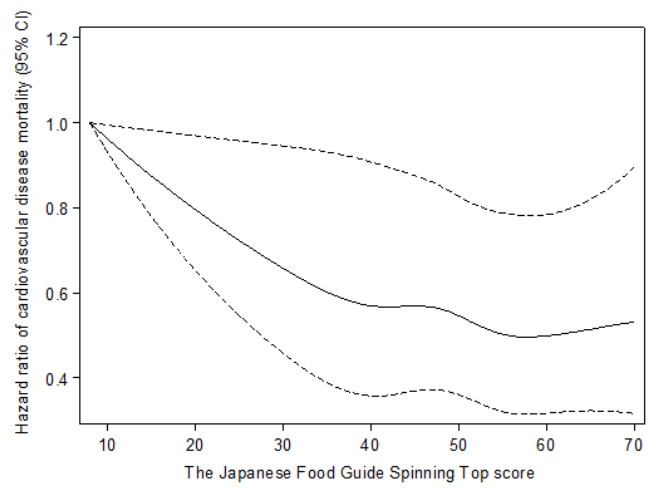

(D)

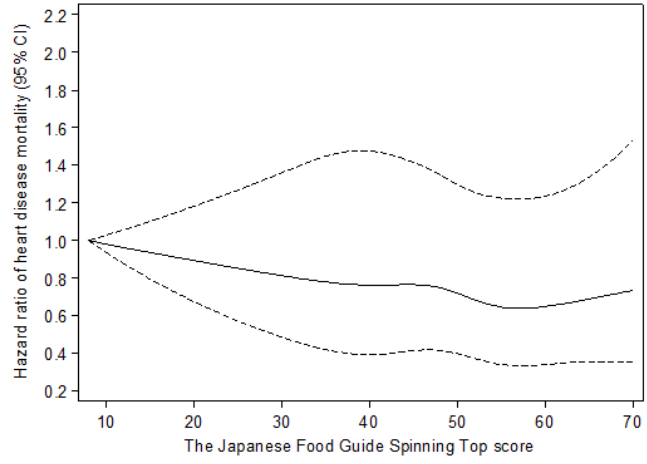

(E)

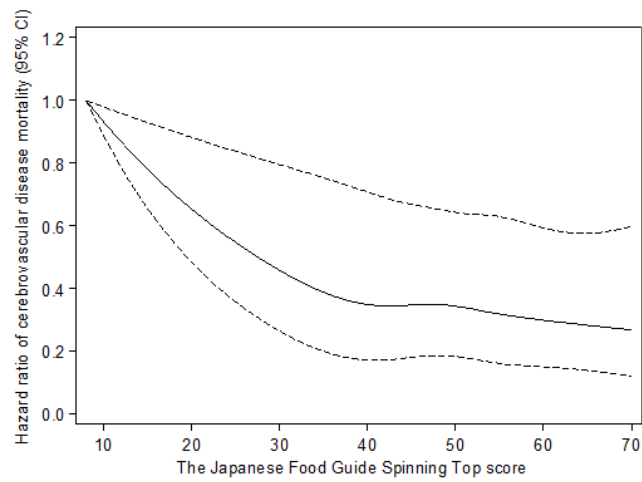

Supplement: kurk028384.ww2_default.pdf [file kurk028384.ww2_default.pdf]
